# Supplementary material for: The Associations of Maternal Hemoglobin Concentration in Different Time Points and Its Changes during Pregnancy with Birth Weight Outcomes
Source: MDPI journal article supplement (doi:10.3390/nu14122542), 2022-06-19
Supplement: s1 [file s1]

**Table S1.** The comparison of general information between participants and non-participants.

| Variables                                           | Non-Participants | Participants  | <i>p</i> |
|-----------------------------------------------------|------------------|---------------|----------|
|                                                     | N = 10,456       | N = 24,183    |          |
| Maternal age, years, mean ± SD                      | 28.51 (3.98)     | 26.64 (3.72)  | <0.001   |
| Education, N (%)                                    |                  |               |          |
| Primary school or below                             | 149 (1.4)        | 441 (1.8)     | <0.001   |
| Junior high school                                  | 1793 (17.3)      | 8270 (34.5)   |          |
| Senior high school                                  | 2115 (20.4)      | 6074 (25.4)   |          |
| College or above                                    | 6333 (61.0)      | 9174 (38.3)   |          |
| Primipara, N (%)                                    |                  |               |          |
| Yes                                                 | 6857 (65.6)      | 14,481 (59.9) | <0.001   |
| No                                                  | 2984 (28.5)      | 2360 (9.8)    |          |
| Unknown                                             | 615 (5.9)        | 7342 (30.4)   |          |
| BMI at 1st trimester, kg/m <sup>2</sup> , mean ± SD | 21.38 (3.09)     | 20.67 (2.61)  | <0.001   |
| Gender of newborn, N (%)                            |                  |               |          |
| Male                                                | 5406 (51.7)      | 12,855 (53.2) | 0.013    |
| Female                                              | 5050 (48.3)      | 11,328 (46.8) |          |
| Mode of delivery, N (%)                             |                  |               |          |
| Vaginal                                             | 5333 (51.0)      | 9393 (38.8)   | <0.001   |
| Cesarean                                            | 4542 (43.4)      | 13,463 (55.7) |          |
| Forceps                                             | 184 (1.8)        | 260 (1.1)     |          |
| Others                                              | 397 (3.8)        | 1067 (4.4)    |          |
| Preterm, N (%)                                      |                  |               |          |
| No                                                  | 9966 (95.3)      | 23,445 (96.9) | <0.001   |
| Yes                                                 | 490 (4.7)        | 738 (3.1)     |          |

**Table S2.** Maternal hemoglobin status in different periods of pregnancy and the change during pregnancy between groups.

| Hemoglobin                                  | Normalweight<br>N = 19,425 | Lightweight<br>N = 2063 | Heavyweight<br>N = 2716 | <i>p</i> |
|---------------------------------------------|----------------------------|-------------------------|-------------------------|----------|
| <b>Maternal Hb Status</b>                   |                            |                         |                         |          |
| First trimester ( <i>n</i> = 24,204)        |                            |                         |                         |          |
| Average, g/L, mean ± SD                     | 123.88 ± 10.09             | 123.61 ± 10.76          | 124.78 ± 9.92           | <0.001   |
| Hb status, N (%)                            |                            |                         |                         |          |
| <100                                        | 189 (1.0)                  | 30 (1.5)                | 17 (0.6)                | 0.001    |
| 100~109                                     | 1136 (5.9)                 | 136 (6.6)               | 139 (5.1)               |          |
| 110~119                                     | 4830 (24.9)                | 501 (24.4)              | 613 (22.6)              |          |
| 120~129                                     | 7911 (40.8)                | 821 (40.0)              | 1115 (41.1)             |          |
| 130~139                                     | 4356 (22.4)                | 447 (21.8)              | 665 (24.5)              |          |
| ≥140                                        | 991 (5.1)                  | 120 (5.8)               | 166 (6.1)               |          |
| Early-second trimester ( <i>n</i> = 19,828) |                            |                         |                         |          |
| Average, g/L, mean ± SD                     | 117.90 ± 9.84              | 118.31 ± 10.14          | 118.09 ± 9.61           | 0.203    |
| Hb status, N (%)                            |                            |                         |                         |          |
| <100                                        | 381 (2.4)                  | 43 (2.6)                | 60 (2.7)                | 0.694    |
| 100~109                                     | 2445 (15.3)                | 230 (13.9)              | 328 (14.7)              |          |
| 110~119                                     | 6407 (40.2)                | 672 (40.5)              | 869 (39.0)              |          |

|                                               |               |               |               |        |
|-----------------------------------------------|---------------|---------------|---------------|--------|
| 120~129                                       | 5119 (32.1)   | 533 (32.1)    | 752 (33.7)    |        |
| 130~139                                       | 1323 (8.3)    | 147 (8.9)     | 182 (8.2)     |        |
| ≥140                                          | 266 (1.7)     | 33 (2.0)      | 38 (1.7)      |        |
| Mediate-second trimester ( <i>n</i> = 21,495) |               |               |               |        |
| Average, g/L, mean ± SD                       | 114.29 ± 9.09 | 114.43 ± 8.88 | 114.39 ± 8.67 | 0.728  |
| Hb status, N (%)                              |               |               |               |        |
| <100                                          | 694 (4.0)     | 73 (4.0)      | 83 (3.4)      | 0.731  |
| 100~109                                       | 4268 (24.8)   | 450 (24.5)    | 608 (25.1)    |        |
| 110~119                                       | 7865 (45.6)   | 815 (44.3)    | 1130 (46.7)   |        |
| 120~129                                       | 3720 (21.6)   | 428 (23.3)    | 500 (20.7)    |        |
| 130~139                                       | 588 (3.4)     | 61 (3.3)      | 81 (3.3)      |        |
| ≥140                                          | 104 (0.6)     | 11 (0.6)      | 16 (0.7)      |        |
| Late-second trimester ( <i>n</i> = 21,432)    |               |               |               |        |
| Average, g/L, mean ± SD                       | 113.27 ± 8.84 | 113.58 ± 8.93 | 112.92 ± 8.61 | 0.048  |
| Hb status, N (%)                              |               |               |               |        |
| <100                                          | 714 (4.1)     | 83 (4.6)      | 111 (4.6)     | 0.028  |
| 100~109                                       | 4885 (28.4)   | 497 (27.3)    | 733 (30.5)    |        |
| 110~119                                       | 8036 (46.7)   | 820 (45.0)    | 1068 (44.5)   |        |
| 120~129                                       | 3097 (18.0)   | 351 (19.3)    | 412 (17.2)    |        |
| 130~139                                       | 395 (2.3)     | 60 (3.3)      | 67 (2.8)      |        |
| ≥140                                          | 83 (0.5)      | 10 (0.5)      | 10 (0.4)      |        |
| Early-third trimester ( <i>n</i> = 21,093)    |               |               |               |        |
| Average, g/L, mean ± SD                       | 113.24 ± 8.63 | 114.57 ± 9.12 | 112.70 ± 8.63 | <0.001 |
| Hb status, N (%)                              |               |               |               |        |
| <100                                          | 716 (4.2)     | 58 (3.2)      | 104 (4.4)     | <0.001 |
| 100~109                                       | 4929 (29.2)   | 442 (24.5)    | 794 (33.3)    |        |
| 110~119                                       | 7698 (45.5)   | 806 (44.6)    | 1012 (42.4)   |        |
| 120~129                                       | 3007 (17.8)   | 429 (23.8)    | 396 (16.6)    |        |
| 130~139                                       | 458 (2.7)     | 60 (3.3)      | 61 (2.6)      |        |
| ≥140                                          | 94 (0.6)      | 11 (0.6)      | 18 (0.8)      |        |
| Late-third trimester ( <i>n</i> = 23,140)     |               |               |               |        |
| Average, g/L, mean ± SD                       | 114.95 ± 8.70 | 116.55 ± 9.21 | 114.27 ± 9.53 | <0.001 |
| Hb status, N (%)                              |               |               |               |        |
| <100                                          | 529 (2.8)     | 49 (2.6)      | 91 (3.5)      | <0.001 |
| 100~109                                       | 4541 (24.3)   | 375 (19.8)    | 741 (28.5)    |        |
| 110~119                                       | 8534 (45.8)   | 819 (43.3)    | 1121 (43.2)   |        |
| 120~129                                       | 4080 (21.9)   | 496 (26.2)    | 503 (19.4)    |        |
| 130~139                                       | 849 (4.6)     | 131 (6.9)     | 119 (4.6)     |        |
| ≥140                                          | 119 (0.6)     | 22 (1.2)      | 21 (0.8)      |        |
| <b>Change in Maternal Hb Concentration</b>    |               |               |               |        |
| Hbfs ( <i>n</i> = 21,389)                     |               |               |               |        |
| Average, g/L, mean ± SD                       | -10.67 ± 9.47 | -10.20 ± 9.53 | -11.84 ± 9.43 | <0.001 |
| Categories, N (%)                             |               |               |               |        |
| Q1 (-50~-17)                                  | 4332 (25.2)   | 444 (24.4)    | 724 (30.2)    | <0.001 |
| Q2 (-17~-11)                                  | 4402 (25.6)   | 429 (23.6)    | 642 (26.8)    |        |

|                           |               |               |                |        |
|---------------------------|---------------|---------------|----------------|--------|
| Q3 (-11~-5)               | 4407 (25.7)   | 476 (26.2)    | 537 (22.4)     |        |
| Q4 (-5~50)                | 4034 (23.5)   | 467 (25.7)    | 495 (20.6)     |        |
| Hbft ( <i>n</i> = 23,103) |               |               |                |        |
| Average, g/L, mean ± SD   | -8.89 ± 11.00 | -6.96 ± 11.43 | -10.51 ± 11.11 | <0.001 |
| Categories, N (%)         |               |               |                |        |
| Q1 (-50~-16)              | 4906 (26.3)   | 391 (20.7)    | 831 (32.1)     | <0.001 |
| Q2 (-16~-9)               | 4572 (24.6)   | 438 (23.2)    | 626 (24.2)     |        |
| Q3 (-9~-2)                | 4527 (24.3)   | 477 (25.2)    | 579 (22.3)     |        |
| Q4 (-2~50)                | 4617 (24.8)   | 584 (30.9)    | 555 (21.4)     |        |
| Hbst ( <i>n</i> = 20,543) |               |               |                |        |
| Average, g/L, mean ± SD   | 1.77 ± 8.46   | 3.10 ± 8.52   | 1.35 ± 8.69    | <0.001 |
| Categories, N (%)         |               |               |                |        |
| Q1 (-50~-3.5)             | 4362 (26.3)   | 347 (20.7)    | 678 (29.5)     | <0.001 |
| Q2 (-3.5~2)               | 4477 (27.0)   | 431 (25.7)    | 610 (26.6)     |        |
| Q3 (2~7)                  | 3727 (22.5)   | 405 (24.1)    | 454 (19.8)     |        |
| Q4 (7~50)                 | 4000 (24.1)   | 497 (29.6)    | 555 (24.2)     |        |

---

Lightweight, small for gestational age (SGA) or low birth weight (LBW); Heavyweight, large for gestational age (LGA) or macrosomia; Hbfs, Hb in late-second minus Hb in first; Hbft, Hb in late-third minus Hb in late-third; Hbst, Hb in late-second minus Hb in late-third; Q, quartile.

**Table S3.** Associations between maternal hemoglobin concentrations in different periods and adverse birth outcomes in women with early-pregnancy BMI < 24 kg/m<sup>2</sup>.

| Hemoglobin               | Normalweight |            | Lightweight              |                          | Heavyweight |                          |                          |
|--------------------------|--------------|------------|--------------------------|--------------------------|-------------|--------------------------|--------------------------|
|                          | N (%)        | N (%)      | Model 1 †<br>OR (95% CI) | Model 2 ‡<br>OR (95% CI) | N (%)       | Model 1 †<br>OR (95% CI) | Model 2 ‡<br>OR (95% CI) |
| First trimester          |              |            |                          |                          |             |                          |                          |
| <100                     | 178 (1.0)    | 27 (1.4)   | 1.41 (0.92, 2.15)        | 1.36 (0.89, 2.08)        | 16 (0.7)    | 0.82 (0.48, 1.38)        | 0.83 (0.49, 1.42)        |
| 100~109                  | 1085 (6.1)   | 132 (6.9)  | 1.16 (0.94, 1.42)        | 1.13 (0.92, 1.40)        | 124 (5.7)   | 1.01 (0.82, 1.25)        | 1.07 (0.86, 1.32)        |
| 110~119                  | 4599 (26.0)  | 478 (25.0) | Ref.                     | Ref.                     | 531 (24.5)  | Ref.                     | Ref.                     |
| 120~129                  | 7211 (40.7)  | 768 (40.2) | 1.01 (0.90, 1.14)        | 1.05 (0.92, 1.18)        | 898 (41.4)  | 1.08 (0.97, 1.22)        | 1.04 (0.93, 1.17)        |
| 130~139                  | 3816 (21.6)  | 404 (21.1) | 1.03 (0.89, 1.18)        | 1.07 (0.93, 1.24)        | 497 (22.9)  | 1.12 (0.98, 1.28)        | 1.07 (0.94, 1.23)        |
| ≥140                     | 809 (4.6)    | 102 (5.3)  | 1.21 (0.96, 1.52)        | 1.25 (0.99, 1.59)        | 104 (4.8)   | 1.08 (0.86, 1.36)        | 0.98 (0.77, 1.24)        |
| Early-second trimester   |              |            |                          |                          |             |                          |                          |
| <100                     | 363 (2.5)    | 40 (2.6)   | 0.97 (0.69, 1.37)        | 0.91 (0.64, 1.29)        | 53 (3.0)    | 1.24 (0.91, 1.69)        | 1.34 (0.98, 1.83)        |
| 100~109                  | 2356 (16.2)  | 222 (14.4) | 0.88 (0.75, 1.03)        | 0.85 (0.72, 1.00)        | 288 (16.2)  | 1.01 (0.87, 1.17)        | 1.07 (0.92, 1.25)        |
| 110~119                  | 5960 (41.0)  | 640 (41.5) | Ref.                     | Ref.                     | 728 (41.0)  | Ref.                     | Ref.                     |
| 120~129                  | 4527 (31.2)  | 485 (31.4) | 1.00 (0.88, 1.14)        | 1.05 (0.92, 1.19)        | 564 (31.8)  | 1.00 (0.88, 1.12)        | 0.94 (0.83, 1.06)        |
| 130~139                  | 1104 (7.6)   | 127 (8.2)  | 1.09 (0.89, 1.34)        | 1.17 (0.95, 1.45)        | 119 (6.7)   | 0.85 (0.69, 1.04)        | 0.76 (0.62, 0.95)        |
| ≥140                     | 218 (1.5)    | 29 (1.9)   | 1.18 (0.78, 1.76)        | 1.26 (0.83, 1.90)        | 22 (1.2)    | 0.88 (0.56, 1.38)        | 0.79 (0.50, 1.26)        |
| Mediate-second trimester |              |            |                          |                          |             |                          |                          |
| <100                     | 667 (4.2)    | 71 (4.1)   | 0.99 (0.76, 1.28)        | 0.89 (0.68, 1.15)        | 74 (3.8)    | 0.91 (0.70, 1.17)        | 1.03 (0.79, 1.34)        |
| 100~109                  | 4039 (25.7)  | 428 (25.0) | 1.01 (0.89, 1.14)        | 0.96 (0.84, 1.09)        | 533 (27.5)  | 1.05 (0.94, 1.18)        | 1.15 (1.03, 1.30)        |
| 110~119                  | 7207 (45.8)  | 759 (44.3) | Ref.                     | Ref.                     | 911 (47.0)  | Ref.                     | Ref.                     |
| 120~129                  | 3219 (20.5)  | 387 (22.6) | 1.13 (0.99, 1.29)        | 1.19 (1.04, 1.36)        | 363 (18.7)  | 0.89 (0.78, 1.02)        | 0.84 (0.73, 0.96)        |
| 130~139                  | 492 (3.1)    | 57 (3.3)   | 1.15 (0.86, 1.53)        | 1.19 (0.89, 1.60)        | 44 (2.3)    | 0.69 (0.50, 0.96)        | 0.65 (0.47, 0.90)        |
| ≥140                     | 95 (0.6)     | 10 (0.6)   | 0.94 (0.48, 1.84)        | 1.02 (0.52, 2.02)        | 13 (0.7)    | 1.10 (0.61, 2.00)        | 0.95 (0.52, 1.75)        |
| Late-second trimester    |              |            |                          |                          |             |                          |                          |
| <100                     | 666 (4.2)    | 79 (4.7)   | 1.11 (0.86, 1.42)        | 0.99 (0.77, 1.27)        | 95 (5.0)    | 1.29 (1.02, 1.62)        | 1.52 (1.20, 1.92)        |
| 100~109                  | 4629 (29.5)  | 472 (27.8) | 0.97 (0.86, 1.09)        | 0.91 (0.81, 1.03)        | 641 (33.5)  | 1.21 (1.08, 1.35)        | 1.32 (1.17, 1.47)        |
| 110~119                  | 7322 (46.7)  | 764 (45.1) | Ref.                     | Ref.                     | 851 (44.5)  | Ref.                     | Ref.                     |
| 120~129                  | 2669 (17.0)  | 318 (18.8) | 1.15 (1.00, 1.33)        | 1.23 (1.06, 1.41)        | 281 (14.7)  | 0.90 (0.78, 1.04)        | 0.84 (0.73, 0.98)        |
| 130~139                  | 338 (2.2)    | 53 (3.1)   | 1.49 (1.10, 2.03)        | 1.56 (1.14, 2.14)        | 36 (1.9)    | 0.96 (0.67, 1.37)        | 0.89 (0.62, 1.28)        |
| ≥140                     | 70 (0.4)     | 9 (0.5)    | 1.09 (0.53, 2.23)        | 1.23 (0.59, 2.55)        | 7 (0.4)     | 0.96 (0.44, 2.11)        | 0.83 (0.37, 1.85)        |

|                       |             |            |                   |                   |            |                   |                   |
|-----------------------|-------------|------------|-------------------|-------------------|------------|-------------------|-------------------|
| Early-third trimester |             |            |                   |                   |            |                   |                   |
| <100                  | 674 (4.4)   | 54 (3.2)   | 0.72 (0.54, 0.96) | 0.65 (0.49, 0.87) | 91 (4.8)   | 1.18 (0.93, 1.49) | 1.32 (1.04, 1.69) |
| 100~109               | 4620 (30.0) | 422 (25.1) | 0.83 (0.73, 0.94) | 0.80 (0.70, 0.90) | 674 (35.3) | 1.26 (1.13, 1.41) | 1.35 (1.20, 1.51) |
| 110~119               | 7022 (45.6) | 754 (44.9) | Ref.              | Ref.              | 815 (42.6) | Ref.              | Ref.              |
| 120~129               | 2618 (17.0) | 385 (22.9) | 1.34 (1.17, 1.53) | 1.39 (1.22, 1.60) | 279 (14.6) | 0.92 (0.79, 1.06) | 0.85 (0.73, 0.98) |
| 130~139               | 394 (2.6)   | 54 (3.2)   | 1.19 (0.88, 1.61) | 1.27 (0.94, 1.73) | 43 (2.3)   | 0.92 (0.66, 1.28) | 0.86 (0.61, 1.20) |
| ≥140                  | 86 (0.6)    | 10 (0.6)   | 1.02 (0.52, 2.01) | 1.01 (0.51, 2.00) | 9 (0.5)    | 0.93 (0.46, 1.86) | 0.87 (0.42, 1.79) |
| Late-third trimester  |             |            |                   |                   |            |                   |                   |
| <100                  | 495 (2.9)   | 46 (2.6)   | 0.95 (0.69, 1.30) | 0.90 (0.65, 1.23) | 79 (3.8)   | 1.33 (1.03, 1.71) | 1.43 (1.10, 1.85) |
| 100~109               | 4266 (25.1) | 355 (20.0) | 0.84 (0.74, 0.96) | 0.82 (0.71, 0.93) | 619 (29.7) | 1.23 (1.10, 1.38) | 1.27 (1.13, 1.42) |
| 110~119               | 7802 (45.8) | 773 (43.6) | Ref.              | Ref.              | 910 (43.7) | Ref.              | Ref.              |
| 120~129               | 3633 (21.3) | 455 (25.7) | 1.26 (1.11, 1.42) | 1.29 (1.14, 1.47) | 382 (18.4) | 0.92 (0.81, 1.04) | 0.86 (0.75, 0.98) |
| 130~139               | 723 (4.2)   | 123 (6.9)  | 1.69 (1.37, 2.09) | 1.88 (1.52, 2.32) | 78 (3.7)   | 0.92 (0.72, 1.18) | 0.83 (0.64, 1.06) |
| ≥140                  | 99 (0.6)    | 19 (1.1)   | 1.96 (1.19, 3.25) | 2.04 (1.22, 3.40) | 13 (0.6)   | 1.14 (0.63, 2.06) | 0.98 (0.53, 1.80) |

---

Lightweight, small for gestational age (SGA) or low birth weight (LBW); Heavyweight, large for gestational age (LGA) or macrosomia. † The model was adjusted for maternal age, education, parity, gestational age of hemoglobin measurement, neonatal gender, gestational age at delivery and mode of delivery. ‡ The model was additionally adjusted for maternal BMI in the first trimester and weight gain during pregnancy.

**Table S4.** Associations between change in maternal hemoglobin concentrations and adverse birth outcomes in women with early-pregnancy BMI < 24 kg/m<sup>2</sup>.

| $\Delta$ Hb   | Normalweight |            | Lightweight              |                          | Heavyweight |                          |                          |
|---------------|--------------|------------|--------------------------|--------------------------|-------------|--------------------------|--------------------------|
|               | N (%)        | N (%)      | Model 1 †<br>OR (95% CI) | Model 2 ‡<br>OR (95% CI) | N (%)       | Model 1 †<br>OR (95% CI) | Model 2 ‡<br>OR (95% CI) |
| Hbfs          |              |            |                          |                          |             |                          |                          |
| Q1 (-50~-17)  | 3893 (24.9)  | 397 (23.5) | Ref.                     | Ref.                     | 563 (29.5)  | Ref.                     | Ref.                     |
| Q2 (-17~-11)  | 3989 (25.5)  | 406 (24.0) | 1.00 (0.86, 1.16)        | 1.04 (0.89, 1.21)        | 516 (27.0)  | 0.90 (0.78, 1.03)        | 0.83 (0.73, 0.96)        |
| Q3 (-11~-5)   | 4029 (25.7)  | 447 (26.4) | 1.12 (0.96, 1.31)        | 1.22 (1.04, 1.43)        | 421 (22.1)  | 0.71 (0.61, 0.82)        | 0.63 (0.54, 0.74)        |
| Q4 (-5~50)    | 3753 (24.0)  | 440 (26.0) | 1.22 (1.02, 1.45)        | 1.38 (1.15, 1.65)        | 408 (21.4)  | 0.71 (0.60, 0.84)        | 0.59 (0.50, 0.71)        |
| Hbft          |              |            |                          |                          |             |                          |                          |
| Q1 (-50~-16)  | 4397 (25.9)  | 362 (20.5) | Ref.                     | Ref.                     | 653 (31.5)  | Ref.                     | Ref.                     |
| Q2 (-16~-9)   | 4144 (24.4)  | 405 (22.9) | 1.30 (1.11, 1.51)        | 1.32 (1.13, 1.54)        | 499 (24.0)  | 0.80 (0.70, 0.91)        | 0.78 (0.68, 0.89)        |
| Q3 (-9~-2)    | 4153 (24.4)  | 449 (25.4) | 1.48 (1.26, 1.74)        | 1.56 (1.33, 1.83)        | 464 (22.4)  | 0.73 (0.64, 0.85)        | 0.69 (0.60, 0.80)        |
| Q4 (-2~50)    | 4296 (25.3)  | 553 (31.3) | 1.87 (1.57, 2.22)        | 2.01 (1.68, 2.39)        | 460 (22.2)  | 0.70 (0.60, 0.83)        | 0.63 (0.54, 0.75)        |
| Hbst *        |              |            |                          |                          |             |                          |                          |
| Q1 (-50~-3.5) | 3959 (26.2)  | 320 (20.3) | Ref.                     | Ref.                     | 521 (28.4)  | Ref.                     | Ref.                     |
| Q2 (-3.5~-2)  | 4062 (26.9)  | 410 (26.0) | 1.22 (1.04, 1.42)        | 1.21 (1.04, 1.42)        | 483 (26.3)  | 0.93 (0.82, 1.07)        | 0.96 (0.84, 1.10)        |
| Q3 (2~7)      | 3410 (22.6)  | 376 (23.9) | 1.34 (1.15, 1.58)        | 1.33 (1.14, 1.57)        | 364 (19.8)  | 0.83 (0.71, 0.95)        | 0.84 (0.73, 0.98)        |
| Q4 (7~50)     | 3684 (24.4)  | 469 (29.8) | 1.52 (1.31, 1.77)        | 1.47 (1.26, 1.72)        | 467 (25.4)  | 1.01 (0.88, 1.16)        | 1.07 (0.93, 1.23)        |

Lightweight, small for gestational age (SGA) or low birth weight (LBW); Heavyweight, large for gestational age (LGA) or macrosomia; Hbfs, Hb in late-second minus Hb in first; Hbft, Hb in late-third minus Hb in late-third; Hbst, Hb in late-second minus Hb in late-third; Q, quartile. † The model was adjusted for maternal age, education, parity, weeks of gestation at hemoglobin measurement, neonatal gender, gestational age at delivery, mode of delivery and Hb concentration in the first trimester. ‡ The model was additionally adjusted for maternal BMI in the first trimester and weight gain during pregnancy. \* Model 1 was adjusted for maternal age, education, parity, weeks of gestation at hemoglobin measurement, neonatal gender, gestational age at delivery, mode of delivery and Hb concentration in the late-second trimester.

**Table S5.** Associations between maternal hemoglobin concentration in different periods and adverse birth outcomes in pregnant women who delivered their baby after 37 weeks of gestational age.

| Hemoglobin               | Normalweight |            | Lightweight              |                          | Heavyweight |                          |                          |
|--------------------------|--------------|------------|--------------------------|--------------------------|-------------|--------------------------|--------------------------|
|                          | N (%)        | N (%)      | Model 1 †<br>OR (95% CI) | Model 2 ‡<br>OR (95% CI) | N (%)       | Model 1 †<br>OR (95% CI) | Model 2 ‡<br>OR (95% CI) |
| First trimester          |              |            |                          |                          |             |                          |                          |
| <100                     | 188 (1.0)    | 23 (1.3)   | 1.30 (0.83, 2.03)        | 1.25 (0.79, 1.96)        | 16 (0.6)    | 0.69 (0.41, 1.17)        | 0.69 (0.41, 1.18)        |
| 100~109                  | 1111 (5.8)   | 123 (7.0)  | 1.19 (0.96, 1.48)        | 1.17 (0.94, 1.44)        | 134 (5.1)   | 0.96 (0.79, 1.18)        | 1.02 (0.83, 1.26)        |
| 110~119                  | 4742 (24.9)  | 439 (24.9) | Ref.                     | Ref.                     | 595 (22.6)  | Ref.                     | Ref.                     |
| 120~129                  | 7749 (40.7)  | 707 (40.2) | 0.99 (0.87, 1.12)        | 1.03 (0.91, 1.17)        | 1087 (41.2) | 1.11 (1.00, 1.24)        | 1.03 (0.92, 1.15)        |
| 130~139                  | 4286 (22.5)  | 368 (20.9) | 0.94 (0.82, 1.09)        | 1.01 (0.87, 1.17)        | 643 (24.4)  | 1.16 (1.03, 1.31)        | 1.04 (0.92, 1.18)        |
| ≥140                     | 972 (5.1)    | 100 (5.7)  | 1.13 (0.90, 1.43)        | 1.26 (1.00, 1.60)        | 162 (6.1)   | 1.28 (1.05, 1.55)        | 1.04 (0.86, 1.28)        |
| Early-second trimester   |              |            |                          |                          |             |                          |                          |
| <100                     | 371 (2.4)    | 37 (2.6)   | 1.05 (0.74, 1.49)        | 0.97 (0.68, 1.38)        | 58 (2.7)    | 1.21 (0.90, 1.63)        | 1.34 (0.99, 1.82)        |
| 100~109                  | 2401 (15.3)  | 203 (14.3) | 0.91 (0.77, 1.08)        | 0.87 (0.73, 1.03)        | 319 (14.8)  | 1.02 (0.88, 1.17)        | 1.13 (0.98, 1.30)        |
| 110~119                  | 6289 (40.2)  | 580 (40.9) | Ref.                     | Ref.                     | 845 (39.1)  | Ref.                     | Ref.                     |
| 120~129                  | 5031 (32.2)  | 446 (31.5) | 0.97 (0.85, 1.10)        | 1.03 (0.90, 1.18)        | 723 (33.5)  | 1.04 (0.94, 1.16)        | 0.94 (0.84, 1.06)        |
| 130~139                  | 1297 (8.3)   | 127 (9.0)  | 1.09 (0.89, 1.33)        | 1.23 (1.00, 1.52)        | 177 (8.2)   | 0.97 (0.81, 1.16)        | 0.80 (0.66, 0.96)        |
| ≥140                     | 258 (1.6)    | 25 (1.8)   | 1.06 (0.70, 1.62)        | 1.21 (0.79, 1.86)        | 37 (1.7)    | 1.07 (0.75, 1.54)        | 0.88 (0.60, 1.28)        |
| Mediate-second trimester |              |            |                          |                          |             |                          |                          |
| <100                     | 675 (4.0)    | 66 (4.2)   | 1.03 (0.79, 1.34)        | 0.91 (0.69, 1.19)        | 81 (3.5)    | 0.88 (0.69, 1.13)        | 1.05 (0.82, 1.35)        |
| 100~109                  | 4197 (24.8)  | 384 (24.4) | 0.99 (0.87, 1.13)        | 0.93 (0.81, 1.06)        | 593 (25.3)  | 1.01 (0.91, 1.13)        | 1.13 (1.01, 1.27)        |
| 110~119                  | 7727 (45.7)  | 706 (44.8) | Ref.                     | Ref.                     | 1090 (46.5) | Ref.                     | Ref.                     |
| 120~129                  | 3645 (21.5)  | 361 (22.9) | 1.09 (0.95, 1.24)        | 1.16 (1.01, 1.33)        | 484 (20.7)  | 0.93 (0.82, 1.04)        | 0.83 (0.73, 0.93)        |
| 130~139                  | 580 (3.4)    | 50 (3.2)   | 1.00 (0.74, 1.35)        | 1.09 (0.80, 1.48)        | 79 (3.4)    | 0.93 (0.73, 1.19)        | 0.79 (0.61, 1.03)        |
| ≥140                     | 100 (0.6)    | 8 (0.5)    | 0.87 (0.42, 1.81)        | 0.97 (0.47, 2.03)        | 16 (0.7)    | 1.15 (0.67, 1.98)        | 0.99 (0.57, 1.73)        |
| Late-second trimester    |              |            |                          |                          |             |                          |                          |
| <100                     | 703 (4.2)    | 72 (4.6)   | 1.14 (0.88, 1.47)        | 1.00 (0.77, 1.30)        | 107 (4.6)   | 1.24 (1.00, 1.54)        | 1.49 (1.19, 1.86)        |
| 100~109                  | 4787 (28.3)  | 432 (27.8) | 1.00 (0.88, 1.13)        | 0.93 (0.81, 1.05)        | 717 (30.8)  | 1.16 (1.05, 1.29)        | 1.31 (1.17, 1.46)        |
| 110~119                  | 7902 (46.8)  | 697 (44.8) | Ref.                     | Ref.                     | 1030 (44.2) | Ref.                     | Ref.                     |
| 120~129                  | 3039 (18.0)  | 297 (19.1) | 1.13 (0.98, 1.30)        | 1.23 (1.06, 1.42)        | 401 (17.2)  | 0.99 (0.87, 1.12)        | 0.87 (0.77, 1.00)        |
| 130~139                  | 388 (2.3)    | 49 (3.2)   | 1.48 (1.08, 2.02)        | 1.62 (1.18, 2.23)        | 65 (2.8)    | 1.32 (1.00, 1.74)        | 1.09 (0.82, 1.45)        |
| ≥140                     | 80 (0.5)     | 8 (0.5)    | 1.07 (0.51, 2.24)        | 1.21 (0.58, 2.54)        | 10 (0.4)    | 1.07 (0.54, 2.08)        | 0.95 (0.48, 1.89)        |

Early-third trimester

|         |             |            |                   |                   |            |                   |                   |
|---------|-------------|------------|-------------------|-------------------|------------|-------------------|-------------------|
| <100    | 703 (4.2)   | 44 (2.9)   | 0.65 (0.47, 0.90) | 0.58 (0.42, 0.80) | 100 (4.3)  | 1.11 (0.89, 1.40) | 1.30 (1.03, 1.64) |
| 100~109 | 4824 (29.1) | 380 (24.8) | 0.83 (0.73, 0.95) | 0.78 (0.68, 0.89) | 777 (33.5) | 1.25 (1.13, 1.39) | 1.36 (1.22, 1.51) |
| 110~119 | 7585 (45.7) | 702 (45.7) | Ref.              | Ref.              | 977 (42.2) | Ref.              | Ref.              |
| 120~129 | 2935 (17.7) | 353 (23.0) | 1.32 (1.16, 1.52) | 1.41 (1.23, 1.62) | 385 (16.6) | 1.00 (0.88, 1.14) | 0.88 (0.77, 1.00) |
| 130~139 | 442 (2.7)   | 46 (3.0)   | 1.18 (0.86, 1.62) | 1.27 (0.92, 1.75) | 61 (2.6)   | 1.03 (0.78, 1.36) | 0.92 (0.69, 1.23) |
| ≥140    | 93 (0.6)    | 10 (0.7)   | 1.15 (0.60, 2.23) | 1.14 (0.58, 2.22) | 16 (0.7)   | 1.40 (0.81, 2.41) | 1.20 (0.67, 2.14) |

Late-third trimester

|         |             |            |                   |                   |             |                   |                   |
|---------|-------------|------------|-------------------|-------------------|-------------|-------------------|-------------------|
| <100    | 522 (2.8)   | 35 (2.1)   | 0.78 (0.55, 1.10) | 0.72 (0.51, 1.03) | 91 (3.6)    | 1.26 (0.99, 1.60) | 1.41 (1.10, 1.80) |
| 100~109 | 4460 (24.3) | 343 (20.3) | 0.86 (0.75, 0.98) | 0.82 (0.72, 0.94) | 729 (28.8)  | 1.23 (1.11, 1.36) | 1.29 (1.16, 1.44) |
| 110~119 | 8415 (45.8) | 743 (44.0) | Ref.              | Ref.              | 1097 (43.3) | Ref.              | Ref.              |
| 120~129 | 4013 (21.9) | 441 (26.1) | 1.29 (1.13, 1.46) | 1.34 (1.18, 1.53) | 481 (19.0)  | 0.92 (0.82, 1.03) | 0.83 (0.74, 0.94) |
| 130~139 | 830 (4.5)   | 110 (6.5)  | 1.55 (1.25, 1.92) | 1.76 (1.41, 2.19) | 115 (4.5)   | 1.05 (0.85, 1.29) | 0.89 (0.72, 1.10) |
| ≥140    | 114 (0.6)   | 18 (1.1)   | 1.96 (1.18, 3.26) | 2.11 (1.25, 3.55) | 20 (0.8)    | 1.34 (0.82, 2.19) | 1.14 (0.69, 1.89) |

---

Lightweight, small for gestational age (SGA) or low birth weight (LBW); Heavyweight, large for gestational age (LGA) or macrosomia. † The model was adjusted for maternal age, education, parity, gestational age of hemoglobin measurement, neonatal gender, gestational age at delivery and mode of delivery. ‡ The model was additionally adjusted for maternal BMI in the first trimester and weight gain during pregnancy.



**Table S6.** Associations between the change in maternal hemoglobin concentrations and adverse birth outcomes in pregnant women who delivered their baby after 37 weeks of gestational age.

| $\Delta$ Hb   | Normalweight |            | Lightweight              |                          | Heavyweight |                          |                          |
|---------------|--------------|------------|--------------------------|--------------------------|-------------|--------------------------|--------------------------|
|               | N (%)        | N (%)      | Model 1 †<br>OR (95% CI) | Model 2 ‡<br>OR (95% CI) | N (%)       | Model 1 †<br>OR (95% CI) | Model 2 ‡<br>OR (95% CI) |
| Hbfs          |              |            |                          |                          |             |                          |                          |
| Q1 (-50~-17)  | 4257 (25.2)  | 379 (24.4) | Ref.                     | Ref.                     | 704 (30.3)  | Ref.                     | Ref.                     |
| Q2 (-17~-11)  | 4312 (25.6)  | 366 (23.6) | 0.96 (0.82, 1.13)        | 1.01 (0.87, 1.19)        | 626 (26.9)  | 0.91 (0.81, 1.03)        | 0.84 (0.74, 0.95)        |
| Q3 (-11~-5)   | 4340 (25.7)  | 407 (26.2) | 1.07 (0.91, 1.25)        | 1.17 (0.99, 1.38)        | 521 (22.4)  | 0.75 (0.66, 0.86)        | 0.65 (0.56, 0.74)        |
| Q4 (-5~50)    | 3955 (23.5)  | 400 (25.8) | 1.17 (0.98, 1.40)        | 1.35 (1.12, 1.62)        | 476 (20.5)  | 0.75 (0.64, 0.87)        | 0.61 (0.52, 0.71)        |
| Hbft          |              |            |                          |                          |             |                          |                          |
| Q1 (-50~-16)  | 4830 (26.4)  | 345 (20.4) | Ref.                     | Ref.                     | 817 (32.3)  | Ref.                     | Ref.                     |
| Q2 (-16~-9)   | 4500 (24.6)  | 400 (23.7) | 1.34 (1.15, 1.57)        | 1.38 (1.18, 1.62)        | 612 (24.2)  | 0.82 (0.73, 0.92)        | 0.78 (0.69, 0.88)        |
| Q3 (-9~-2)    | 4458 (24.3)  | 431 (25.5) | 1.53 (1.30, 1.80)        | 1.63 (1.38, 1.92)        | 561 (22.2)  | 0.77 (0.68, 0.88)        | 0.71 (0.62, 0.81)        |
| Q4 (-2~50)    | 4536 (24.8)  | 513 (30.4) | 1.92 (1.60, 2.29)        | 2.10 (1.75, 2.51)        | 538 (21.3)  | 0.74 (0.64, 0.86)        | 0.64 (0.55, 0.75)        |
| Hbst *        |              |            |                          |                          |             |                          |                          |
| Q1 (-50~-3.5) | 4309 (26.4)  | 302 (20.2) | Ref.                     | Ref.                     | 666 (29.7)  | Ref.                     | Ref.                     |
| Q2 (-3.5~-2)  | 4393 (26.9)  | 387 (25.9) | 1.23 (1.05, 1.44)        | 1.23 (1.05, 1.44)        | 595 (26.6)  | 0.91 (0.81, 1.03)        | 0.93 (0.82, 1.05)        |
| Q3 (2~7)      | 3666 (22.5)  | 369 (24.7) | 1.43 (1.22, 1.68)        | 1.41 (1.20, 1.66)        | 445 (19.9)  | 0.82 (0.72, 0.93)        | 0.83 (0.72, 0.95)        |
| Q4 (7~50)     | 3940 (24.2)  | 438 (29.3) | 1.58 (1.35, 1.85)        | 1.52 (1.30, 1.78)        | 534 (23.8)  | 0.95 (0.84, 1.08)        | 0.99 (0.87, 1.13)        |

Lightweight, small for gestational age (SGA) or low birth weight (LBW); Heavyweight, large for gestational age (LGA) or macrosomia; Hbfs, Hb in late-second minus Hb in first; Hbft, Hb in late-third minus Hb in late-third; Hbst, Hb in late-second minus Hb in late-third; Q, quartile. † The model was adjusted for maternal age, education, parity, weeks of gestation at hemoglobin measurement, neonatal gender, gestational age at delivery, mode of delivery and Hb concentration in the first trimester. ‡ The model was additionally adjusted for maternal BMI in the first trimester and weight gain during pregnancy. \* Model 1 was adjusted for maternal age, education, parity, weeks of gestation at hemoglobin measurement, neonatal gender, gestational age at delivery, mode of delivery and Hb concentration in the late-second trimester.

**Table S7.** Associations between the maternal hemoglobin concentration in different periods and adverse birth weight outcomes in pregnant women who had at least one record of Hb concentration during each defined period.

| Hemoglobin               | Normalweight |            | Lightweight              |                          | Heavyweight |                          |                          |
|--------------------------|--------------|------------|--------------------------|--------------------------|-------------|--------------------------|--------------------------|
|                          | N (%)        | N (%)      | Model 1 †<br>OR (95% CI) | Model 2 ‡<br>OR (95% CI) | N (%)       | Model 1 †<br>OR (95% CI) | Model 2 ‡<br>OR (95% CI) |
| First trimester          |              |            |                          |                          |             |                          |                          |
| <100                     | 120 (1.1)    | 13 (1.2)   | 1.00 (0.55, 1.81)        | 0.98 (0.54, 1.78)        | 13 (0.8)    | 0.93 (0.51, 1.67)        | 0.88 (0.48, 1.62)        |
| 100~109                  | 657 (5.8)    | 62 (5.5)   | 0.91 (0.68, 1.22)        | 0.91 (0.68, 1.21)        | 87 (5.4)    | 1.12 (0.87, 1.45)        | 1.19 (0.92, 1.54)        |
| 110~119                  | 2799 (24.6)  | 290 (25.7) | Ref.                     | Ref.                     | 344 (21.5)  | Ref.                     | Ref.                     |
| 120~129                  | 4640 (40.9)  | 451 (40.0) | 0.94 (0.81, 1.10)        | 0.98 (0.84, 1.15)        | 656 (41.1)  | 1.14 (0.99, 1.32)        | 1.06 (0.92, 1.23)        |
| 130~139                  | 2558 (22.5)  | 244 (21.7) | 0.94 (0.78, 1.12)        | 1.00 (0.83, 1.20)        | 391 (24.5)  | 1.21 (1.03, 1.42)        | 1.09 (0.93, 1.29)        |
| ≥140                     | 581 (5.1)    | 67 (5.9)   | 1.15 (0.87, 1.53)        | 1.25 (0.93, 1.66)        | 106 (6.6)   | 1.42 (1.11, 1.80)        | 1.16 (0.90, 1.50)        |
| Early-second trimester   |              |            |                          |                          |             |                          |                          |
| <100                     | 279 (2.5)    | 30 (2.7)   | 0.95 (0.64, 1.42)        | 0.88 (0.59, 1.31)        | 43 (2.7)    | 1.16 (0.82, 1.63)        | 1.30 (0.91, 1.84)        |
| 100~109                  | 1768 (15.6)  | 158 (14.0) | 0.86 (0.71, 1.05)        | 0.83 (0.68, 1.00)        | 229 (14.3)  | 0.96 (0.81, 1.12)        | 1.06 (0.90, 1.26)        |
| 110~119                  | 4568 (40.2)  | 468 (41.5) | Ref.                     | Ref.                     | 634 (39.7)  | Ref.                     | Ref.                     |
| 120~129                  | 3644 (32.1)  | 347 (30.8) | 0.93 (0.80, 1.08)        | 0.99 (0.85, 1.14)        | 535 (33.5)  | 1.02 (0.90, 1.16)        | 0.93 (0.82, 1.06)        |
| 130~139                  | 920 (8.1)    | 102 (9.1)  | 1.10 (0.88, 1.38)        | 1.22 (0.97, 1.54)        | 131 (8.2)   | 0.97 (0.79, 1.19)        | 0.82 (0.66, 1.01)        |
| ≥140                     | 176 (1.5)    | 22 (2.0)   | 1.23 (0.78, 1.95)        | 1.37 (0.86, 2.19)        | 25 (1.6)    | 1.06 (0.69, 1.64)        | 0.86 (0.55, 1.35)        |
| Mediate-second trimester |              |            |                          |                          |             |                          |                          |
| <100                     | 474 (4.2)    | 46 (4.1)   | 0.96 (0.69, 1.32)        | 0.84 (0.61, 1.17)        | 60 (3.8)    | 0.94 (0.71, 1.25)        | 1.13 (0.84, 1.52)        |
| 100~109                  | 2836 (25.0)  | 278 (24.7) | 1.01 (0.86, 1.17)        | 0.95 (0.81, 1.11)        | 412 (25.8)  | 1.03 (0.90, 1.17)        | 1.17 (1.02, 1.34)        |
| 110~119                  | 5184 (45.7)  | 504 (44.7) | Ref.                     | Ref.                     | 745 (46.6)  | Ref.                     | Ref.                     |
| 120~129                  | 2416 (21.3)  | 249 (22.1) | 1.05 (0.89, 1.23)        | 1.12 (0.95, 1.32)        | 320 (20.0)  | 0.91 (0.79, 1.06)        | 0.82 (0.71, 0.95)        |
| 130~139                  | 370 (3.3)    | 43 (3.8)   | 1.24 (0.89, 1.73)        | 1.32 (0.94, 1.85)        | 49 (3.1)    | 0.87 (0.64, 1.19)        | 0.73 (0.53, 1.01)        |
| ≥140                     | 75 (0.7)     | 7 (0.6)    | 0.90 (0.41, 1.98)        | 1.00 (0.45, 2.21)        | 11 (0.7)    | 1.05 (0.55, 2.00)        | 0.86 (0.44, 1.67)        |
| Late-second trimester    |              |            |                          |                          |             |                          |                          |
| <100                     | 491 (4.3)    | 50 (4.4)   | 0.99 (0.73, 1.35)        | 0.86 (0.63, 1.18)        | 83 (5.2)    | 1.29 (1.00, 1.66)        | 1.56 (1.20, 2.02)        |
| 100~109                  | 3301 (29.1)  | 299 (26.5) | 0.91 (0.78, 1.06)        | 0.84 (0.72, 0.98)        | 476 (29.8)  | 1.06 (0.93, 1.20)        | 1.21 (1.06, 1.38)        |
| 110~119                  | 5265 (46.4)  | 518 (46.0) | Ref.                     | Ref.                     | 738 (46.2)  | Ref.                     | Ref.                     |
| 120~129                  | 2005 (17.7)  | 220 (19.5) | 1.13 (0.95, 1.33)        | 1.21 (1.02, 1.43)        | 249 (15.6)  | 0.86 (0.74, 1.01)        | 0.78 (0.66, 0.92)        |
| 130~139                  | 234 (2.1)    | 34 (3.0)   | 1.43 (0.98, 2.09)        | 1.52 (1.03, 2.24)        | 45 (2.8)    | 1.40 (1.00, 1.96)        | 1.14 (0.80, 1.62)        |
| ≥140                     | 59 (0.5)     | 6 (0.5)    | 0.98 (0.41, 2.29)        | 1.07 (0.45, 2.57)        | 6 (0.4)     | 0.78 (0.33, 1.84)        | 0.71 (0.30, 1.69)        |

Early-third trimester

|         |             |            |                   |                   |            |                   |                   |
|---------|-------------|------------|-------------------|-------------------|------------|-------------------|-------------------|
| <100    | 457 (4.0)   | 31 (2.8)   | 0.65 (0.44, 0.94) | 0.59 (0.40, 0.86) | 76 (4.8)   | 1.31 (1.00, 1.70) | 1.49 (1.13, 1.95) |
| 100~109 | 3276 (28.9) | 264 (23.4) | 0.79 (0.67, 0.92) | 0.74 (0.63, 0.87) | 519 (32.5) | 1.21 (1.07, 1.37) | 1.32 (1.16, 1.50) |
| 110~119 | 5257 (46.3) | 520 (46.1) | Ref.              | Ref.              | 700 (43.8) | Ref.              | Ref.              |
| 120~129 | 2008 (17.7) | 269 (23.9) | 1.31 (1.12, 1.54) | 1.39 (1.19, 1.64) | 256 (16.0) | 0.96 (0.82, 1.12) | 0.84 (0.72, 0.99) |
| 130~139 | 295 (2.6)   | 35 (3.1)   | 1.20 (0.83, 1.73) | 1.25 (0.86, 1.81) | 32 (2.0)   | 0.79 (0.54, 1.16) | 0.72 (0.49, 1.06) |
| ≥140    | 62 (0.5)    | 8 (0.7)    | 1.26 (0.60, 2.66) | 1.30 (0.61, 2.76) | 14 (0.9)   | 1.81 (0.99, 3.28) | 1.57 (0.84, 2.96) |

Late-third trimester

|         |             |            |                   |                   |            |                   |                   |
|---------|-------------|------------|-------------------|-------------------|------------|-------------------|-------------------|
| <100    | 297 (2.6)   | 28 (2.5)   | 0.98 (0.65, 1.46) | 0.93 (0.62, 1.39) | 50 (3.1)   | 1.27 (0.93, 1.75) | 1.38 (1.00, 1.92) |
| 100~109 | 2687 (23.7) | 202 (17.9) | 0.80 (0.67, 0.94) | 0.76 (0.64, 0.91) | 447 (28.0) | 1.26 (1.11, 1.43) | 1.32 (1.15, 1.51) |
| 110~119 | 5344 (47.1) | 501 (44.5) | Ref.              | Ref.              | 710 (44.5) | Ref.              | Ref.              |
| 120~129 | 2492 (21.9) | 298 (26.4) | 1.26 (1.08, 1.46) | 1.31 (1.12, 1.53) | 318 (19.9) | 0.95 (0.83, 1.10) | 0.86 (0.74, 1.00) |
| 130~139 | 472 (4.2)   | 84 (7.5)   | 1.78 (1.38, 2.30) | 1.96 (1.51, 2.54) | 64 (4.0)   | 1.01 (0.77, 1.34) | 0.86 (0.65, 1.15) |
| ≥140    | 63 (0.6)    | 14 (1.2)   | 2.14 (1.16, 3.95) | 2.27 (1.21, 4.25) | 8 (0.5)    | 0.96 (0.46, 2.04) | 0.84 (0.39, 1.79) |

---

Lightweight, small for gestational age (SGA) or low birth weight (LBW); Heavyweight, large for gestational age (LGA) or macrosomia. † The model was adjusted for maternal age, education, parity, gestational age of hemoglobin measurement, neonatal gender, gestational age at delivery and mode of delivery. ‡ The model was additionally adjusted for maternal BMI in the first trimester and weight gain during pregnancy.

**Table S8.** Associations between the change in maternal hemoglobin concentration and adverse birth weight outcomes in pregnant women who had at least one record of Hb concentration during each defined period.

| $\Delta$ Hb   | Normalweight |            | Lightweight              |                          | Heavyweight |                          |                          |
|---------------|--------------|------------|--------------------------|--------------------------|-------------|--------------------------|--------------------------|
|               | N (%)        | N (%)      | Model 1 †<br>OR (95% CI) | Model 2 ‡<br>OR (95% CI) | N (%)       | Model 1 †<br>OR (95% CI) | Model 2 ‡<br>OR (95% CI) |
| Hbfs          |              |            |                          |                          |             |                          |                          |
| Q1 (-50~-17)  | 2926 (25.8)  | 276 (24.6) | Ref.                     | Ref.                     | 488 (30.6)  | Ref.                     | Ref.                     |
| Q2 (-17~-11)  | 2941 (26.0)  | 253 (22.5) | 0.93 (0.77, 1.12)        | 0.98 (0.81, 1.18)        | 435 (27.3)  | 0.92 (0.79, 1.06)        | 0.85 (0.73, 0.99)        |
| Q3 (-11~-5)   | 2909 (25.7)  | 312 (27.8) | 1.20 (0.99, 1.45)        | 1.31 (1.08, 1.59)        | 350 (22.0)  | 0.74 (0.63, 0.87)        | 0.65 (0.55, 0.77)        |
| Q4 (-5~50)    | 2556 (22.6)  | 282 (25.1) | 1.27 (1.02, 1.57)        | 1.46 (1.18, 1.82)        | 321 (20.1)  | 0.77 (0.64, 0.93)        | 0.62 (0.51, 0.75)        |
| Hbft          |              |            |                          |                          |             |                          |                          |
| Q1 (-50~-16)  | 2990 (26.4)  | 228 (20.3) | Ref.                     | Ref.                     | 527 (33.1)  | Ref.                     | Ref.                     |
| Q2 (-16~-9)   | 2824 (24.9)  | 264 (23.5) | 1.35 (1.12, 1.64)        | 1.39 (1.14, 1.69)        | 379 (23.8)  | 0.77 (0.66, 0.90)        | 0.74 (0.63, 0.86)        |
| Q3 (-9~-2)    | 2768 (24.4)  | 285 (25.3) | 1.59 (1.30, 1.94)        | 1.67 (1.36, 2.04)        | 355 (22.3)  | 0.74 (0.63, 0.87)        | 0.69 (0.58, 0.81)        |
| Q4 (-2~50)    | 2757 (24.3)  | 348 (30.9) | 2.08 (1.67, 2.59)        | 2.24 (1.80, 2.80)        | 332 (20.8)  | 0.71 (0.59, 0.86)        | 0.62 (0.51, 0.75)        |
| Hbst *        |              |            |                          |                          |             |                          |                          |
| Q1 (-50~-3.5) | 2894 (25.5)  | 224 (19.9) | Ref.                     | Ref.                     | 459 (28.8)  | Ref.                     | Ref.                     |
| Q2 (-3.5~-2)  | 3043 (26.8)  | 290 (25.8) | 1.20 (1.00, 1.44)        | 1.20 (1.00, 1.44)        | 434 (27.2)  | 0.94 (0.82, 1.09)        | 0.97 (0.83, 1.12)        |
| Q3 (2~7)      | 2621 (23.1)  | 261 (23.2) | 1.26 (1.04, 1.52)        | 1.25 (1.03, 1.51)        | 324 (20.3)  | 0.82 (0.71, 0.96)        | 0.85 (0.72, 1.00)        |
| Q4 (7~50)     | 2784 (24.5)  | 350 (31.1) | 1.57 (1.31, 1.87)        | 1.51 (1.26, 1.81)        | 377 (23.7)  | 0.92 (0.79, 1.07)        | 0.97 (0.83, 1.13)        |

Lightweight, small for gestational age (SGA) or low birth weight (LBW); Heavyweight, large for gestational age (LGA) or macrosomia; Hbfs, Hb in late-second minus Hb in first; Hbft, Hb in late-third minus Hb in late-third; Hbst, Hb in late-second minus Hb in late-third; Q, quartile. † The model was adjusted for maternal age, education, parity, weeks of gestation at hemoglobin measurement, neonatal gender, gestational age at delivery, mode of delivery and Hb concentration in the first trimester. ‡ The model was additionally adjusted for maternal BMI in the first trimester and weight gain during pregnancy. \* Model 1 was adjusted for maternal age, education, parity, weeks of gestation at hemoglobin measurement, neonatal gender, gestational age at delivery, mode of delivery and Hb concentration in the late-second trimester.
